# Supplementary material for: Stochastic Analysis of the SOS Response in Escherichia coli
Source: PubMed Central journal article supplement (PMC2675100; doi:10.1371/journal.pone.0005363), 2009-05-08
Supplement: pone.0005363.s001.pdf [file pone.0005363.s001.pdf]

**Supporting information for the paper:  
Stochastic Analysis of the SOS Response in *Escherichia coli***

Yishai Shimoni<sup>1,2</sup>, Shoshy Altuvia<sup>1</sup>, Hanah Margalit<sup>1</sup>,  
and Ofer Biham<sup>2</sup>

<sup>1</sup> Department of Molecular Genetics and Biotechnology,  
Faculty of Medicine, The Hebrew University,  
Jerusalem 91120, Israel

<sup>2</sup> Racah Institute of Physics, The Hebrew University,  
Jerusalem 91904, Israel

### I. RATE EQUATIONS FOR THE SOS MODEL

Below we introduce the notation for the SOS model. The number of reporter genes is denoted by  $n$ . We denote the number of *recA* mRNAs, *lexA* mRNAs, and reporter gene mRNAs by  $m_R$ ,  $m_L$ , and  $m_G$ , respectively. We denote the number of RecA, LexA, and GFP proteins by  $R$ ,  $L$ , and  $G$ , respectively. The number of LexA proteins that are bound to the promoter site of *recA*, *lexA*, and the reporter gene are denoted by  $b_R$ ,  $b_L$ , and  $b_G$ , respectively. For convenience, we also use the number of free promoter sites of each gene, denoting them by  $f_i$ ,  $i = L, R$  or  $G$ . The rate constant for the transcription of *recA* mRNAs, *lexA* mRNAs, and the reporter gene mRNAs are denoted by  $g_{m_R}$ ,  $g_{m_L}$ , and  $g_{m_G}$ , respectively. The translation rate constants of the RecA, LexA, and GFP proteins are denoted by  $g_R$ ,  $g_L$ , and  $g_G$ , respectively. The degradation rate constants are denoted by  $d_j$ , where  $j = m_R, m_L, m_G$  for mRNA molecules and  $j = R, L$ , and  $G$  for proteins. The rate constant for the binding of LexA proteins to the promoter site of *recA*, *lexA*, and the reporter gene are denoted by  $c_R$ ,  $c_L$ , and  $c_G$ , respectively, while their dissociation rate constants are denoted by  $s_R$ ,  $s_L$ , and  $s_G$ , respectively. The rate constant for the binding of RecA and LexA proteins is denoted by  $c_p$ . We note that when RecA proteins mark LexA for cleavage, RecA proteins remain unaffected. The rate equations for the SOS model take the form

$$\frac{dm_R}{dt} = g_{m_R}(1 - b_R) - d_{m_R}m_R, \quad (1)$$

$$\frac{dm_L}{dt} = g_{m_L}(1 - b_L) - d_{m_L}m_L, \quad (2)$$

$$\frac{dR}{dt} = g_Rm_R - d_RR, \quad (3)$$

$$\begin{aligned} \frac{dL}{dt} &= g_Lm_L - d_LL - c_L(1 - b_L)L + s_Lb_L - c_R(1 - b_R)L + s_Rb_R \\ &\quad - c_G(n - b_G)L + s_Gb_G - c_pRL, \end{aligned} \quad (4)$$

$$\frac{db_R}{dt} = c_R(1 - b_R)L - s_Rb_R, \quad (5)$$

$$\frac{db_L}{dt} = c_L(1 - b_L)L - s_Lb_L, \quad (6)$$

$$\frac{dm_G}{dt} = g_{m_G}(n - b_G) - d_{m_G}m_G, \quad (7)$$

$$\frac{dG}{dt} = g_Gm_G, \quad (8)$$

$$\frac{db_G}{dt} = c_G(n - b_G)L - s_Gb_G. \quad (9)$$
